# Supplementary material
Source: PubMed Central journal article supplement (PMC10600978)
Supplement: NIHMS1938371-supplement-1.pdf [file NIHMS1938371-supplement-1.pdf]

## ■ ASSOCIATED CONTENT

### Data Availability Statement

The raw data required to reproduce these findings are available upon request to Brendan Harley. The processed data required to reproduce these findings are available upon request to Brendan Harley.

### SI Supporting Information

The Supporting Information is available free of charge at <https://pubs.acs.org/doi/10.1021/acsbiomaterials.3c00290>.

Custom NanoString gene codes and values of licensed hMSC gene fold changes at day 0 (PDF)
