# Supplementary material
Source: PubMed Central journal article supplement (PMC10600978)
Supplement: NIHMS1938371-supplement-Supplemental_Info.pdf [file NIHMS1938371-supplement-Supplemental_Info.pdf]

# Supplemental Information: Inflammatory licensed hMSCs exhibit enhanced immunomodulatory capacity in a biomaterial mediated manner

*Vasiliki Kolliopoulos<sup>1</sup>, Maxwell Polanek<sup>1</sup>, Hui Xu<sup>2</sup>, Brendan Harley<sup>1,3,4</sup>*

<sup>1</sup> Dept. Chemical and Biomolecular Engineering, University of Illinois at Urbana-Champaign,

Urbana, IL 61801

<sup>2</sup> Tumor Engineering and Phenotyping (TEP) Shared Resource, Cancer Center at Illinois

University of Illinois Urbana-Champaign, Urbana, IL 61801

<sup>3</sup> Cancer Center at Illinois, University of Illinois at Urbana-Champaign, Urbana, IL 61801

<sup>4</sup> Carl R. Woese Institute for Genomic Biology, University of Illinois at Urbana-Champaign,

Urbana, IL 61801

## TABLES

**Supp. Table 1.** NanoString panel gene list.

| <b>Customer Name</b> | <b>HUGO Gene</b> | <b>Probe NSID</b> |
|----------------------|------------------|-------------------|
| ALPL                 | ALPL             | NM_000478.3:2065  |
| ANGPT1               | ANGPT1           | NM_001146.3:2080  |
| BGLAP                | BGLAP            | NM_199173.4:44    |
| BMP2                 | BMP2             | NM_001200.2:1515  |
| BMP7                 | BMP7             | NM_001719.1:525   |
| CCL2                 | CCL2             | NM_002982.3:123   |
| CCL7                 | CCL7             | NM_006273.2:120   |
| COL1A2               | COL1A2           | NM_000089.3:2635  |
| MCSF                 | CSF1             | NM_000757.4:823   |
| IL8                  | CXCL8            | NM_000584.2:25    |

|        |         |                     |
|--------|---------|---------------------|
| FGFR2  | FGFR2   | NM_000141.4:2204    |
| GAPDH  | GAPDH   | NM_001256799.1:386  |
| GUSB   | GUSB    | NM_000181.3:1899    |
| HGF    | HGF     | NM_000601.4:550     |
| IDO1   | IDO1    | NM_002164.5:369     |
| IGF2   | IGF2    | NM_000612.4:765     |
| IHH    | IHH     | NM_002181.2:1693    |
| IL10   | IL10    | NM_000572.2:622     |
| IL1RN  | IL1RN   | NM_000577.3:480     |
| IL6    | IL6     | NM_000600.3:364     |
| GAL9   | LGALS9  | NM_002308.3:359     |
| MMP9   | MMP9    | NM_004994.2:1530    |
| OAZ1   | OAZ1    | NM_004152.2:313     |
| PTGS2  | PTGS2   | NM_000963.1:495     |
| RUNX2  | RUNX2   | NM_004348.3:1850    |
| SEMA3A | SEMA3A  | NM_006080.1:585     |
| SMAD5  | SMAD5   | NM_005903.5:1044    |
| SOX9   | SOX9    | NM_000346.2:2135    |
| SP7    | SP7     | NM_001173467.1:1510 |
| OPN    | SPP1    | NM_000582.2:760     |
| TSG6   | TNFAIP6 | NM_007115.2:250     |

|           |           |                     |
|-----------|-----------|---------------------|
| TNFRSF11A | TNFRSF11A | NM_003839.3:226     |
| TNFRSF11B | TNFRSF11B | NM_002546.2:1075    |
| TNFSF11   | TNFSF11   | NM_003701.2:490     |
| VEGFA     | VEGFA     | NM_001025366.1:1325 |
| VEGFB     | VEGFB     | NM_003377.3:687     |
| WNT16     | WNT16     | NM_057168.1:1621    |
| WNT5a     | WNT5A     | NM_003392.3:475     |

**Supp. Table 2:** Day 0 licensed MSC log<sub>2</sub> average gene expression normalized to day 0 basal

MSC and expressed as a fold change (n=3). Blue is lowest and red is highest value.

|  |               |
|--|---------------|
|  | Licensed MSCs |
|  | Day 0         |

|      |           |       |
|------|-----------|-------|
|      | ALPL      | 0.56  |
|      | BGLAP     | -1.33 |
|      | BMP2      | 3.36  |
|      | BMP7      | 0.01  |
|      | COL1A2    | -0.71 |
|      | FGFR2     | 0.66  |
|      | IGF2      | -0.72 |
|      | IHH       | 0.47  |
|      | MMP9      | 2.37  |
|      | OPN       | 1.94  |
|      | RUNX2     | -0.32 |
|      | SEMA3A    | 0.61  |
|      | SMAD5     | -0.77 |
|      | SOX9      | -0.54 |
|      | SP7       | 0.55  |
|      | TNFSF11   | 1.08  |
|      | TNFRSF11B | 0.17  |
|      | WNT16     | -0.85 |
|      | WNT5a     | 1.57  |
| Immu | CCL2      | 9.91  |

|              |           |       |
|--------------|-----------|-------|
| nomodulatory | CCL7      | 1.28  |
|              | GAL9      | 9.86  |
|              | HGF       | 1.00  |
|              | IDO1      | 10.01 |
|              | IL8       | 6.55  |
|              | IL10      | 1.11  |
|              | IL1RN     | 3.17  |
|              | IL6       | 5.23  |
|              | MCSF      | 4.01  |
|              | PTGS2     | 3.24  |
|              | TNFRSF11A | 1.46  |
|              | TSG6      | 8.14  |
| Angiogenic   | ANGPT1    | -0.35 |
|              | VEGFA     | -0.35 |
|              | VEGFB     | -0.45 |
| Housekeeping | GAPDH     | -0.02 |
|              | GUSB      | -0.19 |
|              | OAZ1      | -0.05 |

Data Repository: [https://data.mendeley.com/datasets/th97vx97sy/draft?a=3797cdda-](https://data.mendeley.com/datasets/th97vx97sy/draft?a=3797cdda-634b-4b6d-a828-e46fc327254a)

[634b-4b6d-a828-e46fc327254a](https://data.mendeley.com/datasets/th97vx97sy/draft?a=3797cdda-634b-4b6d-a828-e46fc327254a)
